# Supplementary material
Source: HighWire-hosted journal article supplement (https://www.cmajopen.ca/highwire/filestream/88335/field_highwire_adjunct_files/0/open-2021-0193-original-submission.pdf)
Supplement: open-2021-0193-original-submission.pdf [file open-2021-0193-original-submission.pdf]

**Comparing the Scopes of Geriatric-Focused Physicians in Canada:  
A Qualitative Study of Core Competencies**

**Authors:**

Rebecca H. Correia, Amina Jabbar, Henry Yu-Hin Siu, Sophie Hogeveen, Daryl Dash, Fabrice I. Mowbray, Andrew P. Costa, Meredith Vanstone

- |                                                                                                                   |                                                                                                                   |
|-------------------------------------------------------------------------------------------------------------------|-------------------------------------------------------------------------------------------------------------------|
| 1. Rebecca H. Correia, BSc <sup>a, b</sup><br><a href="mailto:correirh@mcmaster.ca">correirh@mcmaster.ca</a>      | 5. Daryl Dash, MSc <sup>a, b</sup><br><a href="mailto:dashd@mcmaster.ca">dashd@mcmaster.ca</a>                    |
| 2. Amina Jabbar, MSc, MD, FRCPC <sup>a, b</sup><br><a href="mailto:jabbaram@mcmaster.ca">jabbaram@mcmaster.ca</a> | 6. Fabrice I. Mowbray, MScN, RN <sup>a, b</sup><br><a href="mailto:mowbrayf@mcmaster.ca">mowbrayf@mcmaster.ca</a> |
| 3. Henry Yu-Hin Siu, MSc, MD, CCFP (COE) <sup>c</sup><br><a href="mailto:siuh3@mcmaster.ca">siuh3@mcmaster.ca</a> | 7. Andrew P. Costa, PhD <sup>a, b</sup><br><a href="mailto:acosta@mcmaster.ca">acosta@mcmaster.ca</a>             |
| 4. Sophie Hogeveen, PhD <sup>a, b</sup><br><a href="mailto:hogevees@mcmaster.ca">hogevees@mcmaster.ca</a>         | 8. Meredith Vanstone, PhD <sup>c</sup><br><a href="mailto:vanstomg@mcmaster.ca">vanstomg@mcmaster.ca</a>          |

**Affiliations:**

- a. Department of Health Research Methods, Evidence and Impact, McMaster University | Hamilton, Ontario, Canada
- b. Big Data and Geriatric Models of Care (BDG) Cluster, McMaster University | Hamilton, Ontario, Canada
- c. Department of Family Medicine, McMaster University | Hamilton, Ontario, Canada

---

**Corresponding Author:** Rebecca Correia  
**Email:** [correirh@mcmaster.ca](mailto:correirh@mcmaster.ca)  
**Address:** 10-B Victoria Street South, Kitchener, Ontario, Canada, N2G 1C5

---

**Funding Statement:** The authors received no specific funding for this work.

**Declaration of Competing Interests:** No competing interests were declared.

1  
2  
3 31 **INTRODUCTION**  
4

5  
6 32 Ensuring equitable access to geriatric-focused medical care is an ongoing challenge,  
7  
8 33 given the limited number of physicians with geriatric-specific training or expertise.<sup>1</sup> Adults over  
9  
10 34 the age of 65 are among the fastest-growing cohorts in the developed world, living longer than  
11  
12 35 ever, with high rates of multimorbidity and geriatric complexity.<sup>2</sup>  
13  
14

15 36 Longstanding deficits of medical expertise in the care of older adults are recognized.<sup>1,3,4</sup>  
16  
17 37 Little is known, however, about how specialists with overlapping scopes of practice coordinate  
18  
19 38 care in ways that most efficiently and equitably increase access to their services. Physicians may  
20  
21 39 lack confidence and competence to manage the complex needs of some older adults,<sup>5,6</sup> leaving  
22  
23 40 three Canadian medical specialties to contribute the majority of care for older Canadians:  
24  
25 41 family physicians with certification in Care of the Elderly (FM-COE), geriatricians, and geriatric  
26  
27 42 psychiatrists. While there is evidence to support decision-making within individual specialties  
28  
29 43 about systems of care,<sup>7-10</sup> there is a lack of reporting on shared medical knowledge and  
30  
31 44 synergies in the care of older patients.  
32  
33  
34  
35  
36

37 45 Competencies provide a foundational base of knowledge required to practice in a  
38  
39 46 particular domain of medicine, outlining the fundamental expectations of trainees.<sup>11-14</sup> While  
40  
41 47 competencies do not represent firm boundaries of knowledge or skills, they provide a starting  
42  
43 48 point for a program of study that will identify scopes of practice. Prior work has described the  
44  
45 49 processes of identifying and establishing competencies for geriatric-focused medical  
46  
47 50 disciplines,<sup>12-15</sup> but much remains unknown about their convergence. Therefore, to identify  
48  
49 51 areas of overlap in scopes of practice and points of distinction between the three geriatric-  
50  
51 52 focused specialties, we compared the competencies for FM-COE, geriatricians, and geriatric  
52  
53  
54  
55  
56  
57  
58  
59  
60

1  
2  
3 53 psychiatrists. This work aims to stimulate critical thinking about the opportunities for physicians  
4  
5  
6 54 to collaborate in the care of a shared patient population, in ways that recognize their unique  
7  
8 55 perspectives and professional identities.  
9

## 10 56 **METHODS**

11  
12  
13 57 **Study design and setting.** In this qualitative study, we used a comparative approach to  
14  
15 58 document analysis in order to identify overlap between the competencies of Canadian FM-COE,  
16  
17  
18 59 geriatricians, and geriatric psychiatrists, as defined by their respective regulatory colleges.<sup>16</sup>  
19

20 60 **Data collection.** The College of Family Physicians of Canada (CFPC) and the Royal College  
21  
22  
23 61 of Physicians and Surgeons of Canada (RCPSC) provide publicly available documentation of the  
24  
25 62 competencies required to be a certified practitioner of FM-COE, geriatric medicine, or geriatric  
26  
27  
28 63 psychiatry. We identified documents on the CFPC and RCPSC websites by searching for the  
29  
30 64 terms “competenc\* AND Canada AND care of the elderly OR geriatric psychiatry OR geriatric  
31  
32 65 medicine” (n=6).<sup>17–20</sup> We consulted experts in each specialty to confirm the completeness and  
33  
34  
35 66 relevance of these documents.  
36

37 67 **Data analysis.** Two researchers (AJ and RC) reviewed the documents in full and used a  
38  
39  
40 68 data extraction template to independently examine and code the documents using a directed  
41  
42 69 (deductive) content analysis approach.<sup>21</sup> Directed content analysis uses an existing framework  
43  
44  
45 70 to organize data and enable comparison across specialties.<sup>16</sup> The CanMEDS and CanMEDS–  
46  
47 71 Family Medicine (FM) Frameworks were used to examine the relevance of competencies to the  
48  
49  
50 72 seven CanMEDS Roles: Medical Expert/Family Medicine Expert, Communicator, Collaborator,  
51  
52 73 Leader, Health Advocate, Scholar, and Professional.<sup>22,23</sup> We compared the presence of  
53  
54  
55 74 competencies within each CanMEDS Role across each of the specialties; AJ and RC documented  
56  
57  
58  
59  
60

1  
2  
3 75 memos independently and in duplicate to identify any patterns. Results were compared to  
4  
5 76 identify areas of disagreement, which were resolved through discussion. An inductive content  
6  
7  
8 77 analysis was then used to identify themes within each CanMEDS Role and categorize similar  
9  
10 78 competencies. Ethics approval for this project was not required, given that data were publicly  
11  
12  
13 79 available online.

## 14 15 80 **RESULTS**

16  
17  
18 81 **Table 1** displays the results of our analysis, for both unique and shared competencies,  
19  
20 82 grouped by the CanMEDS Roles. In each category, concordance is described before difference.

21  
22 83 **Medical Expert/Family Medicine Expert:** The competency lists of all three provider  
23  
24  
25 84 types indicate proficiency in eliciting patient histories and tailoring health promotion and  
26  
27  
28 85 disease prevention interventions. All providers are expected to differentiate normal and  
29  
30 86 abnormal aging, and consider the contributions of a patient's comorbidities, frailty, and  
31  
32 87 functional status, when determining patient prognosis. Appropriately prescribing  
33  
34  
35 88 pharmaceuticals and preventing, diagnosing, and managing delirium, are recognized as core  
36  
37  
38 89 competencies. Providers should be able to assess issues related to capacity and competency  
39  
40 90 (i.e., personal decision-making and driving). All providers are expected to examine, diagnose,  
41  
42 91 and manage neurocognitive disorders (i.e., dementia), and associated behavioural changes or  
43  
44  
45 92 disturbances. All providers should be able to enquire about caregiver stress and capacity, and  
46  
47 93 be prepared to facilitate end-of-life discussions.

48  
49 94 Geriatricians and FM-COE are expected to be competent in best practices for fall  
50  
51  
52 95 prevention and screening to identify predisposing factors of falls. They should be able to  
53  
54  
55 96 diagnose and manage osteoporosis and fracture risk, and develop rehabilitative approaches.

1  
2  
3 97 Geriatricians and FM-COE are also expected to perform detailed medication reviews, assess  
4  
5 98 urinary incontinence, diagnose and manage pain, and manage palliative and end-of-life care  
6  
7  
8 99 issues.  
9

10  
11 100 Items unique to geriatric psychiatrists include they must be knowledgeable about  
12  
13 101 psychotherapeutic constructs, psychopharmacology, and therapeutic approaches. They are  
14  
15 102 expected to exhibit extensive knowledge about mental illnesses and psychiatric disorders.  
16  
17  
18 103 Geriatricians are responsible for performing comprehensive geriatrics assessments and  
19  
20 104 diagnosing and managing bowel dysfunction.  
21

22  
23 105 **Communicator:** All providers are expected to elicit and synthesize information from  
24  
25 106 patients, families, and care providers, and consult with colleagues when required or requested.  
26  
27  
28 107 They should be able to recognize and mitigate communication barriers by providing assistive  
29  
30 108 devices, and ensure adequate communication during transfers of care.  
31

32  
33 109 Geriatric psychiatrists and geriatricians are expected to prioritize issues for patient  
34  
35 110 encounters by recognizing their roles as specialists. Exclusively, geriatric psychiatrists must be  
36  
37 111 proficient in the use of telepsychiatry.  
38

39  
40 112 **Collaborator:** All providers must be competent in performing timely consults, exhibiting  
41  
42 113 respect towards team members, and collaborating on assessments and care management. They  
43  
44 114 are expected to respect the scopes of practice, differences, and overlapping responsibilities of  
45  
46  
47 115 other providers. They should be able to engage in shared decision-making with families and  
48  
49  
50 116 caregivers in team discussions and case conferences. All providers are expected to identify  
51  
52 117 learning and improvement opportunities, and plan and deliver learning activities.  
53  
54  
55  
56  
57  
58  
59  
60

1  
2  
3 118 Geriatric psychiatrists must distinctively describe other geriatric mental health care  
4  
5  
6 119 teams' roles and responsibilities. They are also expected to demonstrate leadership and act as  
7  
8 120 an expert resource on issues such as mental health legislation.  
9

10 121 **Leader:** All providers must be familiar with community resources (e.g., geriatric and  
11  
12 social support services) to facilitate equitable patient access and use. They must also engage in  
13 122 the stewardship of health care resources by allocating resources for optimal patient care and  
14  
15 123 avoiding over-investigation. Additionally, providers are expected to mediate and resolve  
16  
17 124 conflicts that may arise. All providers should be able to employ quality improvement methods  
18  
19 125 to evaluate and improve healthcare systems, allocate resources, and manage cost-appropriate  
20  
21 126 care. They must also understand the structure and function of the healthcare system relevant  
22  
23 127 to caring for older patients.  
24  
25  
26  
27  
28

29  
30 129 Geriatricians must be competent in the use of health informatics to improve the quality  
31  
32 130 of care and optimize patient safety.  
33

34  
35 131 **Health Advocate:** All providers should be flexible to meet patient needs and preferences  
36  
37 132 for care management. They must recognize and manage elder abuse, neglect, and  
38  
39 133 mistreatment. All providers must be competent in advocating for essential hospital and  
40  
41 134 community resources and services, as well as systems-level change.  
42  
43  
44

45 135 Geriatricians and geriatric psychiatrists are expected to identify and respond to health  
46  
47 136 policies, identify vulnerable or marginalized populations, and respond to cultural issues.  
48  
49 137 Geriatricians must be competent in identifying patient vulnerabilities that increase their risk for  
50  
51 138 poor health (e.g., inadequate access to primary care) and advocating for evidence-based  
52  
53  
54  
55  
56  
57  
58  
59  
60

1  
2  
3 139 primary care. FM-COE should be able to determine the need for immediate interventions  
4  
5  
6 140 (including home visits) to mitigate harm.

7  
8 141 **Scholar:** All providers are expected to recognize knowledge limitations and gaps in the  
9  
10 142 literature specific to geriatric populations' medical care. They must also be competent and  
11  
12  
13 143 engaged in research by posing scholarly questions, applying scientific methods, and  
14  
15 144 communicating and disseminating findings. They are expected to participate in research,  
16  
17  
18 145 program development, medical education, and other activities that improve health care of the  
19  
20 146 elderly.

21  
22  
23 147 Geriatricians and geriatric psychiatrists should be able to appraise evidence, research,  
24  
25 148 and literature critically. Exclusively, geriatricians should be able to recognize the influence of  
26  
27  
28 149 role-modelling and its impact on learners' formal, informal, and hidden curriculum.

29  
30 150 **Professional:** All providers are expected to identify decision-making capacities among  
31  
32 151 patients and obtain and document informed consent. They must be competent in respecting  
33  
34  
35 152 patient privacy and confidentiality while recognizing, fulfilling, and adhering to professional and  
36  
37  
38 153 ethical codes. They are expected to conform to legal obligations, policies, and procedures  
39  
40 154 relevant to substitute decision-making.

41  
42 155 Geriatricians and geriatric psychiatrists are expected to exhibit appropriate professional  
43  
44  
45 156 boundaries with patients and families. They must be competent in demonstrating a  
46  
47  
48 157 commitment to high-quality care and excellence, while prioritizing personal and professional  
49  
50 158 duties.

51  
52 159 **INTERPRETATION**  
53  
54  
55  
56  
57  
58  
59  
60

1  
2  
3 160 **Summary of findings.** Our analysis of the respective practice competencies across  
4  
5  
6 161 geriatric-focused providers, as documented by the individual colleges, is the first effort to  
7  
8 162 define these differences. We identified substantial overlaps in the expected medical expertise  
9  
10 163 of FM-COE and geriatricians, which blurs the scopes and boundaries across disciplines. While  
11  
12  
13 164 there were few substantive differences, such as the expectation that geriatric psychiatrists be  
14  
15 165 conversant with psychotherapeutic techniques and medications, some distinctions may be the  
16  
17  
18 166 result of different priorities to specify particular competencies. For example, while not an  
19  
20 167 explicit competency, it is likely that FM-COE are also expected to maintain appropriate  
21  
22  
23 168 professional boundaries with patients and families. While collaboration is expected among all  
24  
25 169 geriatric-focused providers, the absence of published literature concerning their shared areas of  
26  
27  
28 170 practice and individual competencies may inhibit opportunities for collaboration moving  
29  
30 171 forward.

31  
32 172 When examining the priority clinical domains set out by the CFPC, it is not initially  
33  
34  
35 173 apparent where the CanMEDS-FM roles of scholarship, advocacy, leadership, and  
36  
37  
38 174 professionalism are addressed in training. We feel that this discrepancy likely results from the  
39  
40 175 CFPC having multiple guiding documents detailing the professional activities and clinical  
41  
42 176 competencies that a FM-COE physician should exhibit. The CFPC recently published its national  
43  
44  
45 177 standards for “Core Professional Activities” (or CPAs); there is a CPA list specific for PGY-3  
46  
47 178 residents pursuing an extra year of training in COE.<sup>20</sup> The CPAs list indicates that scholarship,  
48  
49  
50 179 advocacy, leadership and professionalism are expected for FM-COE. Given that FM-COE  
51  
52 180 physicians are family physicians first, the documents reviewed in this paper serve to augment,  
53  
54  
55 181 not replace, the core clinical and professional competencies expected of all family physicians.

1  
2  
3 182 **Explanation of findings.** Canada has long acknowledged severe shortages in geriatric  
4  
5  
6 183 medicine and services.<sup>3,4</sup> While field experts and leaders encourage and support medical  
7  
8 184 trainees to pursue a geriatric medicine specialty,<sup>24,25</sup> many have acquiesced to the idea that  
9  
10 185 training through the FM-COE pathway may be more efficient.<sup>13,26,27</sup> However, in the  
11  
12 186 development of the FM-COE training pathway, we have missed an opportunity to specify how  
13  
14 187 they are – and even if they are – different from geriatricians. While family physicians with COE  
15  
16 188 training have additional specialization levels that blur the lines between primary care and  
17  
18 189 specialist providers, they boast longitudinal relationships that enable care continuity as their  
19  
20 190 patients age.<sup>27</sup> Similarly, to posit that geriatricians care for the sickest amongst older adults is  
21  
22 191 also not sufficient. That premise surmises that family physicians have little to offer those  
23  
24 192 patients, when in fact, in the context of a complicated health system, that is very much the  
25  
26 193 opposite.<sup>28</sup>

27  
28  
29  
30  
31  
32 194 Since 1989, family physicians had opportunities to receive additional certification in an  
33  
34 195 enhanced area of family medicine practice.<sup>29</sup> The eligibility criteria to earn enhanced  
35  
36 196 certifications, including COE, vary as some physicians earn the certification through completion  
37  
38 197 of medical residency, whereas others are eligible through clinical practice or leadership  
39  
40 198 routes.<sup>30</sup> Some family physicians utilize their additional training to practice in multiple care  
41  
42 199 settings and take on specialized roles – similar to their counterparts practicing in similar  
43  
44 200 medicine areas that have undergone different pathways into a specialty.<sup>29,31</sup> Despite similar  
45  
46 201 competency profiles, geriatricians and FM-COE are hired, compensated, and deployed within  
47  
48 202 the healthcare system in very different ways.<sup>8,10,31</sup> Based on our account of the similarities  
49  
50  
51  
52  
53  
54  
55  
56  
57  
58  
59  
60

1  
2  
3 203 among FM-COE and geriatricians (especially in terms of medical expertise), we question why  
4  
5  
6 204 their practices are considered so different.

7  
8 205 **Future directions.** We acknowledge that medical care of older adults is a shared  
9  
10 206 responsibility of all physicians. However, there is a need to determine how best to assign  
11  
12  
13 207 responsibility for specialized care of older adults, given physicians' overlapping scopes of  
14  
15 208 practice.<sup>32</sup> Research is needed to characterize the degree to which geriatric-focused providers  
16  
17  
18 209 exemplify these competencies in daily practice and negotiate the scopes of their shared  
19  
20 210 competencies, especially as patient/medical complexity increases. Currently, literature  
21  
22  
23 211 describing the characteristics and practice patterns of FM-COE is sparse,<sup>8,33,34</sup> despite the need  
24  
25 212 to better understand how their medical practice differs from geriatricians. Additionally, more  
26  
27  
28 213 research is needed to characterize the impacts of geriatric-focused providers on practice  
29  
30 214 patterns, patient outcomes and satisfaction, and health service use.

31  
32 215 Future work to identify geriatric-focused providers' practice locations may offer insights  
33  
34  
35 216 about access to care. For instance, in rural and remote regions of Canada, community hospitals  
36  
37  
38 217 may not have access to staff geriatric psychiatrists. However, based on our understanding of  
39  
40 218 overlaps in medical expertise, they may be able to leverage the services of either FM-COE or  
41  
42 219 geriatricians. This pattern of gaps and overlaps highlights an opportunity to build capacity in  
43  
44  
45 220 geriatric care amongst their generalist colleagues. For example, in the situation detailed above,  
46  
47 221 collaboration between a FM-COE and generalist psychiatrist may help meet the psychiatric care  
48  
49 222 needs of older adults in that community.

50  
51  
52 223 Lastly, the degree of detail used to define the expected level of competence varied  
53  
54 224 across disciplines, which hindered our comparisons. Geriatric psychiatry had a useful way of  
55  
56  
57  
58  
59  
60

1  
2  
3 225 framing competencies by specifying the degree of knowledge depth to which trainees and  
4  
5  
6 226 subspecialists were expected to attain, although definitions surrounding the evaluation of  
7  
8 227 competence were not provided. Establishing whether geriatric-focused providers should  
9  
10 228 acquire “advanced” or “expert” level knowledge is essential to tailor and standardize  
11  
12  
13 229 evaluations across specialties.

14  
15 230 **Limitations.** Comparisons across the three physician types were limited by the  
16  
17 231 organization and degree of detail specified in each competency list. The RCPSC organized  
18  
19 232 geriatric medicine and geriatric psychiatry competencies according to CanMEDS roles, whereas  
20  
21 233 the CFPC framed FM-COE competencies around 18 priority areas of knowledge. Additionally,  
22  
23 234 our analysis was limited to the document review and not the lived experiences of geriatricians,  
24  
25 235 FM-COE, and geriatric psychiatrists. However, expertise of the clinical and academic co-authors  
26  
27 236 were utilized to discern whether competencies that were not explicitly stated in some lists,  
28  
29 237 were implied or relevant to other providers. Lastly, the CFPC competency list reflects the  
30  
31 238 expectations of family physicians who complete COE training through medical residency and  
32  
33 239 may not represent those who earned the COE designation through clinical practice or  
34  
35 240 leadership routes.

36  
37 241 **Conclusion.** Our work is the first to identify the commonalities and differences in the  
38  
39 242 scopes of competencies among geriatric-focused physicians in Canada. We identified  
40  
41 243 substantial overlaps in the expected medical expertise of FM-COE and geriatricians, and some  
42  
43 244 unique competencies to particular disciplines. However, some competencies are not explicitly  
44  
45 245 documented, and the degree of required knowledge was inadequately defined in some  
46  
47 246 regulatory documents. Therefore, our findings should encourage efforts to develop more  
48  
49  
50  
51  
52  
53  
54  
55  
56  
57  
58  
59  
60

1  
2  
3  
4  
5  
6  
7  
8  
9  
10  
11  
12  
13  
14  
15  
16  
17  
18  
19  
20  
21  
22  
23  
24  
25  
26  
27  
28  
29  
30  
31  
32  
33  
34  
35  
36  
37  
38  
39  
40  
41  
42  
43  
44  
45  
46  
47  
48  
49  
50  
51  
52  
53  
54  
55  
56  
57  
58  
59  
60

247 robust definitions of medical practice and delineations of scopes of practice for these providers,  
248 which may ultimately facilitate more equitable and accessible medical care for older adults.

Confidential

## REFERENCES

1. Canadian Medical Association. The State of Seniors Health Care in Canada [Internet]. Ottawa, ON: Canadian Medical Association; 2016 Sep [cited 2021 Jan 26] p. 20. Available from: <https://www.cma.ca/sites/default/files/2018-11/the-state-of-seniors-health-care-in-canada-september-2016.pdf>
2. Statistics Canada. Population Projections for Canada (2018 to 2068), Provinces and Territories (2018 to 2043) [Internet]. Her Majesty the Queen in Right of Canada as represented by the Minister of Industry; 2019 Sep. Available from: <https://www150.statcan.gc.ca/n1/en/pub/91-520-x/91-520-x2019001-eng.pdf?st=OOnjLsP7>
3. Borrie M, Cooper T, Basu M, Kay K, Prorok JC, Seitz D. Ontario Geriatric Specialist Physician Resources 2018. *Canadian Geriatrics Journal*. 2020 Sep;23(3):219.
4. Hogan DB, Borrie M, Basran JFS, Chung AM, Jarrett PG, Morais JA, et al. Specialist Physicians in Geriatrics— Report of the Canadian Geriatrics Society Physician Resource Work Group. *Can Geriatr J*. 2012 Sep 20;15(3):68–79.
5. Drickamer MA, Levy B, Irwin KS, Rohrbaugh RM. Perceived needs for geriatric education by medical students, internal medicine residents and faculty. *J Gen Intern Med*. 2006 Dec;21(12):1230–4.
6. Gazewood JD, Vanderhoff B, Ackermann R, Cefalu C. Geriatrics in family practice residency education: an unmet challenge. *Fam Med*. 2003 Jan;35(1):30–4.
7. American Geriatrics Society Core Writing Group of the Task Force. Caring for older Americans: The future of geriatric medicine [Internet]. American Geriatrics Society; 2005 [cited 2020 Aug 25] p. S245–56. Available from: <http://doi.wiley.com/10.1111/j.1532-5415.2005.53350.x>
8. Frank C. Challenges and achievements in caring for the elderly. *Can Fam Physician*. 2010;56(11):1101–2.
9. Katz PR, Ryskina K, Saliba D, Costa A, Jung H-Y, Wagner LM, et al. Medical Care Delivery in U.S. Nursing Homes: Current and Future Practice. *The Gerontologist*. 2021 Jun 1;61(4):595–604.
10. Moore A, Patterson C, Nair K, Oliver D, Brown A, Keating P, et al. Minding the gap: Prioritization of care issues among nurse practitioners, family physicians and geriatricians when caring for the elderly. *J Interprof Care*. 2015 Jul 4;29(4):401–3.
11. Hogan TM, Losman ED, Carpenter CR, Sauvigne K, Irmiter C, Emanuel L, et al. Development of geriatric competencies for emergency medicine residents using an expert consensus process. *Acad Emerg Med*. 2010;17(3):316–24.

12. Charles L, Frank CC, Allen T, Lozanovska T, Arcand M, Feldman S, et al. Identifying the Priority Topics for the Assessment of Competence in Care of the Elderly. *Can Geriatr J.* 2018 Mar 26;21(1):6–13.
13. Charles L, Triscott JAC, Dobbs BM, McKay R. Geriatric core competencies for family medicine curriculum and enhanced skills: Care of elderly. *Can Geriatr J.* 2014;17(2):53–62.
14. Andrew MH, Shea C. Geriatric psychiatry education in Canada: the pathway to subspecialty recognition. *Int Psychogeriatr.* 2010 Sep;22(6):919–26.
15. Fox RA, Clarfield AM, Hogan DB. Competencies required for the practice of geriatric medicine as a consultant physician. *CMAJ Can Med Assoc J.* 1989 Nov 15;141(10):1045–8.
16. Bowen G. Document Analysis as a Qualitative Research Method. *Qual Res J.* 2009 Aug 3;9:27–40.
17. College of Family Physicians of Canada. Priority Topics and Key Features for the Assessment of Competence in Care of the Elderly [Internet]. The College of Family Physicians of Canada; 2017 Apr p. 24. Available from: [https://portal.cfpc.ca/resourcesdocs/uploadedFiles/Education/COE\\_KF\\_Final\\_ENG.pdf](https://portal.cfpc.ca/resourcesdocs/uploadedFiles/Education/COE_KF_Final_ENG.pdf)
18. The Royal College of Physicians and Surgeons of Canada. Objectives of Training in the Subspecialty of Geriatric Medicine [Internet]. The Royal College of Physicians and Surgeons of Canada; 2015 Jul p. 16. Available from: [https://www.royalcollege.ca/rcsite/documents/ibd/geriatric\\_medicine\\_otr\\_e](https://www.royalcollege.ca/rcsite/documents/ibd/geriatric_medicine_otr_e)
19. The Royal College of Physicians and Surgeons of Canada. Objectives of Training in the Subspecialty of Geriatric Psychiatry [Internet]. The Royal College of Physicians and Surgeons of Canada; 2010 Jul p. 14. Available from: <https://www.royalcollege.ca/rcsite/documents/ibd/geriatric-psychiatry-otr-e.pdf>
20. College of Family Physicians of Canada. Residency Training Profile for Family Medicine and Enhanced Skills Programs Leading to Certificates of Added Competence [Internet]. The College of Family Physicians of Canada; 2021 May p. 77. Available from: [cfpc.ca/CFPC/media/Resources/Education/Residency-Training-Profile-ENG.pdf](https://www.cfpc.ca/CFPC/media/Resources/Education/Residency-Training-Profile-ENG.pdf)
21. Hsieh H-F, Shannon SE. Three Approaches to Qualitative Content Analysis. *Qual Health Res.* 2005 Nov;15(9):1277–88.
22. The Royal College of Physicians and Surgeons of Canada. CanMEDS: Better standards, better physicians, better care [Internet]. Royal College of Physicians and Surgeons of Canada; 2015. Available from: <https://www.royalcollege.ca/rcsite/canmeds/canmeds-framework-e>
23. CanMEDS-FM 2017: A competency framework for family physicians across the continuum [Internet]. Mississauga, ON: The College of Family Physicians of Canada; 2017. Available

1  
2  
3 from: <https://www.cfpc.ca/CFPC/media/Resources/Medical-Education/CanMEDS-Family-Medicine-2017-ENG.pdf>  
4  
5

- 6  
7 24. Frank C, Martin RE. Humanities and Geriatric Education: a Strategy for Recruitment? *Can Geriatr J.* 2015 Mar 31;18(1):37–41.  
8  
9  
10 25. You P, Leung M, Xu VYY, Astell A, Gill SS, Gibson M, et al. Pre-Clerkship Observerships to  
11 Increase Early Exposure to Geriatric Medicine. *Can Geriatr J.* 2015 Dec 30;18(4):225–30.  
12  
13 26. Lam R, Lee L, Tazkarji B, Lee J, Freedman A, Meiyappan S. Five-Weekend Care of the  
14 Elderly Certificate Course. *Can Fam Physician.* 2015;61:135–41.  
15  
16 27. Ingram E, Dunkley O, Willoughby K, Yaffe M, Rodríguez C. Assessing family medicine  
17 residents' preparedness for the practice of geriatric care. *PRiMER.* 2019;3(15):9.  
18  
19 28. Kvamme OJ, Olesen F, Samuelsson M. Improving the interface between primary and  
20 secondary care: a statement from the European Working Party on Quality in Family  
21 Practice (EQuiP). *BMJ Qual Saf.* 2001;10(1):33–9.  
22  
23 29. Grierson L, Allice I, Baker A, Farag A, Guscott J, Howard M, et al. The impacts of the  
24 Certificates of Added Competence credentialing program: A qualitative case study of  
25 enhanced skill Family Medicine practice across Canada. *CMAJ Open.* 2021;  
26  
27 30. The College of Family Physicians of Canada. Eligibility Criteria for a Certificate of Added  
28 Competence (CAC) in Care of the Elderly (COE) [Internet]. The College of Family Physicians  
29 of Canada; p. 1. Available from:  
30 [https://portal.cfpc.ca/resourcesdocs/uploadedFiles/Education/Eligibility\\_Criteria%20COE\\_](https://portal.cfpc.ca/resourcesdocs/uploadedFiles/Education/Eligibility_Criteria%20COE_website%20ENG.pdf)  
31 [website%20ENG.pdf](https://portal.cfpc.ca/resourcesdocs/uploadedFiles/Education/Eligibility_Criteria%20COE_website%20ENG.pdf)  
32  
33  
34  
35  
36 31. Frank C, Seguin R. Care of the elderly training. *Can Fam Physician.* 2009 May;55(5):510-  
37 511.e4.  
38  
39 32. Grierson L, Vanstone M. The rich potential for education research in family medicine and  
40 general practice. *Adv Health Sci Educ* [Internet]. 2020 Sep 28 [cited 2020 Oct 20]; Available  
41 from: <http://link.springer.com/10.1007/s10459-020-09994-7>  
42  
43 33. Moore A, Patterson C, White J, House S, Riva J, Nair K, et al. Interprofessional and  
44 integrated care of the elderly in a family health team. *Can Fam Physician.* 2012;58:6.  
45  
46 34. Lam RE, Gallinaro A, Adleman J. Medical problems referred to a care of the elderly  
47 physician: Insight for future geriatrics CME. *Can Geriatr J.* 2013;16(3):114–9.  
48  
49  
50  
51  
52  
53  
54  
55  
56  
57  
58  
59  
60

1  
2  
3  
4  
5  
6  
7  
8  
9  
10  
11  
12  
13  
14  
15  
16  
17  
18  
19  
20  
21  
22  
23  
24  
25  
26  
27  
28  
29  
30  
31  
32  
33  
34  
35  
36  
37  
38  
39  
40  
41  
42  
43  
44  
45  
46  
47

**Table 1.** Summary of the core competencies of geriatric psychiatrists, geriatricians, and FM-COE by CanMEDS Roles

| CanMEDS Role                            | Competency                                                                                                              | Geriatric Psychiatrists | Geriatricians | Family Medicine, Care of the Elderly |
|-----------------------------------------|-------------------------------------------------------------------------------------------------------------------------|-------------------------|---------------|--------------------------------------|
| Medical Expert / Family Medicine Expert | Differentiate normal and abnormal aging                                                                                 | X                       | X             | X                                    |
|                                         | Consider a patient’s comorbidities, frailty, and functional status to prognosis                                         | X                       | X             | X                                    |
|                                         | Prevent, diagnose, and manage delirium                                                                                  | X                       | X             | X                                    |
|                                         | Examine, diagnose, and manage neurocognitive disorders (i.e., dementia) and associated behavioural changes/disturbances | X                       | X             | X                                    |
|                                         | Appropriately prescribe pharmaceuticals                                                                                 | X                       | X             | X                                    |
|                                         | Elicit patient histories                                                                                                | X                       | X             | X                                    |
|                                         | Tailor health promotion and disease prevention interventions                                                            | X                       | X             | X                                    |
|                                         | Assess issues related to capacity and competency (i.e., personal decision making, driving)                              | X                       | X             | X                                    |
|                                         | Enquire about caregiver stress and capacity                                                                             | X                       | X             | X                                    |
|                                         | Be knowledgeable about end-of-life care                                                                                 | X                       | X             | X                                    |
|                                         | Apply best practices for falls prevention and screening                                                                 |                         | X             | X                                    |
|                                         | Diagnose and manage osteoporosis and fracture risk                                                                      |                         | X             | X                                    |
|                                         | Develop rehabilitative approaches                                                                                       |                         | X             | X                                    |
|                                         | Perform detailed medication reviews                                                                                     |                         | X             | X                                    |
|                                         | Assess for urinary incontinence                                                                                         |                         | X             | X                                    |
|                                         | Diagnose and manage pain                                                                                                |                         | X             | X                                    |
|                                         | Manage palliative and end-of-life care issues                                                                           |                         | X             | X                                    |
|                                         | Be knowledgeable about psychotherapeutic constructs, psychopharmacology, and therapeutic approaches                     | X                       |               |                                      |
|                                         | Exhibit extensive knowledge about mental illnesses and psychiatric disorders                                            | X                       |               |                                      |
|                                         | Perform a comprehensive geriatrics assessment                                                                           |                         | X             |                                      |
| Diagnose and manage bowel dysfunction   |                                                                                                                         | X                       |               |                                      |
| Communicator                            | Elicit and synthesize information from patients, families, and care providers                                           | X                       | X             | X                                    |
|                                         | Recognize and mitigate communication barriers                                                                           | X                       | X             | X                                    |
|                                         | Consider the merits of a second opinion                                                                                 | X                       | X             | X                                    |
|                                         | Ensure communication during transfers/handover                                                                          | X                       | X             | X                                    |

|                 |                                                                                                               |   |   |   |
|-----------------|---------------------------------------------------------------------------------------------------------------|---|---|---|
|                 | Prioritize issues for patient encounters with a recognition that the role is that of a specialist (not a PCP) | X | X |   |
|                 | Proficient in the use of telepsychiatry                                                                       | X |   |   |
| Collaborator    | Perform timely consults                                                                                       | X | X | X |
|                 | Exhibit respect for team members                                                                              | X | X | X |
|                 | Collaborate on assessments and care management                                                                | X | X | X |
|                 | Respect the scopes of practice, differences, and overlapping/ shared responsibilities of providers            | X | X | X |
|                 | Engage in shared decision-making with families and caregivers                                                 | X | X | X |
|                 | Identify opportunities for learning and improvement                                                           | X | X | X |
|                 | Plan and deliver learning activities                                                                          | X | X | X |
|                 | Describe the roles/responsibilities of geriatric mental health care teams and demonstrate leadership in teams | X |   |   |
|                 | Act as an expert resource on issues such as mental health legislation                                         | X |   |   |
| Leader          | Be knowledgeable about community resources                                                                    | X | X | X |
|                 | Mediate and resolve conflicts within interprofessional teams                                                  | X | X | X |
|                 | Apply quality improvement principles to evaluate/ improve healthcare systems and cost-appropriate care        | X | X | X |
|                 | Understand the healthcare system relevant to caring for older patients                                        | X | X |   |
|                 | Competent in the use of health informatics to improve care quality and optimize safety                        |   | X |   |
|                 | Engage in stewardship of health care resources                                                                | X | X | X |
| Health Advocate | Adapt to meet patient needs and preferences                                                                   | X | X | X |
|                 | Recognize/manage elder abuse, neglect, and mistreatment                                                       | X | X | X |
|                 | Advocate for essential hospital and community resources/services                                              | X | X | X |
|                 | Identify and respond to policies affecting health                                                             | X | X | X |
|                 | Identify vulnerable/ marginalized populations and respond to cultural issues                                  | X | X |   |
|                 | Identify patient vulnerabilities                                                                              |   | X |   |
|                 | Advocate for evidence-based health promotion                                                                  |   | X |   |
|                 | Determine the need for immediate intervention, such as home visits                                            |   |   | X |
| Scholar         | Recognize knowledge limitations/gaps in literature specific to the medical care of geriatric populations      | X | X | X |

1  
2  
3  
4  
5  
6  
7  
8  
9  
10  
11  
12  
13  
14  
15  
16  
17  
18  
19  
20  
21  
22  
23  
24  
25  
26  
27  
28  
29  
30  
31  
32  
33  
34  
35  
36  
37  
38  
39  
40  
41  
42  
43  
44  
45  
46  
47

|              |                                                                                                                             |   |   |   |
|--------------|-----------------------------------------------------------------------------------------------------------------------------|---|---|---|
|              | Critically appraise evidence, research, and literature                                                                      | X | X |   |
|              | Pose scholarly questions, select/apply methods to address questions, and communicate/disseminate findings                   | X | X |   |
|              | Participate in research, program development, medical education, and other activities that improve the delivery of services | X | X | X |
|              | Recognize the influence of role-modelling and the impact of the formal, informal, and hidden curricula on learners          |   | X |   |
| Professional | Identify the capacity for decision-making                                                                                   | X | X | X |
|              | Obtain and document informed consent                                                                                        | X | X | X |
|              | Respect confidentiality, privacy, and ethical codes                                                                         | X | X | X |
|              | Adhere to substitute decision-making policies                                                                               | X | X | X |
|              | Exhibit appropriate professional boundaries                                                                                 | X | X |   |
|              | Demonstrate a commitment to high-quality care and excellence                                                                | X | X |   |
|              | Prioritize personal and professional duties                                                                                 | X | X |   |

## Standards for Reporting Qualitative Research (SRQR)\*

<http://www.equator-network.org/reporting-guidelines/srqr/>

Line no(s).

### Title and abstract

|                                                                                                                                                                                                                                                              |                     |
|--------------------------------------------------------------------------------------------------------------------------------------------------------------------------------------------------------------------------------------------------------------|---------------------|
| <p><b>Title</b> - Concise description of the nature and topic of the study Identifying the study as qualitative or indicating the approach (e.g., ethnography, grounded theory) or data collection methods (e.g., interview, focus group) is recommended</p> | 1-2                 |
| <p><b>Abstract</b> - Summary of key elements of the study using the abstract format of the intended publication; typically includes background, purpose, methods, results, and conclusions</p>                                                               | See "Abstract" file |

### Introduction

|                                                                                                                                                                     |       |
|---------------------------------------------------------------------------------------------------------------------------------------------------------------------|-------|
| <p><b>Problem formulation</b> - Description and significance of the problem/phenomenon studied; review of relevant theory and empirical work; problem statement</p> | 32-40 |
| <p><b>Purpose or research question</b> - Purpose of the study and specific objectives or questions</p>                                                              | 50-55 |

### Methods

|                                                                                                                                                                                                                                                                                                                                                                                                             |                |
|-------------------------------------------------------------------------------------------------------------------------------------------------------------------------------------------------------------------------------------------------------------------------------------------------------------------------------------------------------------------------------------------------------------|----------------|
| <p><b>Qualitative approach and research paradigm</b> - Qualitative approach (e.g., ethnography, grounded theory, case study, phenomenology, narrative research) and guiding theory if appropriate; identifying the research paradigm (e.g., postpositivist, constructivist/ interpretivist) is also recommended; rationale**</p>                                                                            | 57-59          |
| <p><b>Researcher characteristics and reflexivity</b> - Researchers' characteristics that may influence the research, including personal attributes, qualifications/experience, relationship with participants, assumptions, and/or presuppositions; potential or actual interaction between researchers' characteristics and the research questions, approach, methods, results, and/or transferability</p> | 65-66<br>73-76 |
| <p><b>Context</b> - Setting/site and salient contextual factors; rationale**</p>                                                                                                                                                                                                                                                                                                                            | 60-63          |
| <p><b>Sampling strategy</b> - How and why research participants, documents, or events were selected; criteria for deciding when no further sampling was necessary (e.g., sampling saturation); rationale**</p>                                                                                                                                                                                              | 63-66          |
| <p><b>Ethical issues pertaining to human subjects</b> - Documentation of approval by an appropriate ethics review board and participant consent, or explanation for lack thereof; other confidentiality and data security issues</p>                                                                                                                                                                        | 78-79          |
| <p><b>Data collection methods</b> - Types of data collected; details of data collection procedures including (as appropriate) start and stop dates of data collection and analysis, iterative process, triangulation of sources/methods, and modification of procedures in response to evolving study findings; rationale**</p>                                                                             | 60-66          |

|                       |                                                                                                                                                                                                                                                       |       |
|-----------------------|-------------------------------------------------------------------------------------------------------------------------------------------------------------------------------------------------------------------------------------------------------|-------|
| 1<br>2<br>3<br>4<br>5 | <b>Data collection instruments and technologies</b> - Description of instruments (e.g., interview guides, questionnaires) and devices (e.g., audio recorders) used for data collection; if/how the instrument(s) changed over the course of the study | 67-68 |
| 6<br>7<br>8           | <b>Units of study</b> - Number and relevant characteristics of participants, documents, or events included in the study; level of participation (could be reported in results)                                                                        | 63-66 |
| 9<br>10<br>11<br>12   | <b>Data processing</b> - Methods for processing data prior to and during analysis, including transcription, data entry, data management and security, verification of data integrity, data coding, and anonymization/de-identification of excerpts    | 65-66 |
| 13<br>14<br>15<br>16  | <b>Data analysis</b> - Process by which inferences, themes, etc., were identified and developed, including the researchers involved in data analysis; usually references a specific paradigm or approach; rationale**                                 | 67-78 |
| 17<br>18<br>19<br>20  | <b>Techniques to enhance trustworthiness</b> - Techniques to enhance trustworthiness and credibility of data analysis (e.g., member checking, audit trail, triangulation); rationale**                                                                | 75-76 |

### Results/findings

|                      |                                                                                                                                                                                                   |                    |
|----------------------|---------------------------------------------------------------------------------------------------------------------------------------------------------------------------------------------------|--------------------|
| 23<br>24<br>25<br>26 | <b>Synthesis and interpretation</b> - Main findings (e.g., interpretations, inferences, and themes); might include development of a theory or model, or integration with prior research or theory | 80-158             |
| 27<br>28<br>29       | <b>Links to empirical data</b> - Evidence (e.g., quotes, field notes, text excerpts, photographs) to substantiate analytic findings                                                               | See "Table 1" file |

### Discussion

|                                  |                                                                                                                                                                                                                                                                                                                                                                                                             |         |
|----------------------------------|-------------------------------------------------------------------------------------------------------------------------------------------------------------------------------------------------------------------------------------------------------------------------------------------------------------------------------------------------------------------------------------------------------------|---------|
| 32<br>33<br>34<br>35<br>36<br>37 | <b>Integration with prior work, implications, transferability, and contribution(s) to the field</b> - Short summary of main findings; explanation of how findings and conclusions connect to, support, elaborate on, or challenge conclusions of earlier scholarship; discussion of scope of application/generalizability; identification of unique contribution(s) to scholarship in a discipline or field | 160-229 |
| 38<br>39                         | <b>Limitations</b> - Trustworthiness and limitations of findings                                                                                                                                                                                                                                                                                                                                            | 230-240 |

### Other

|                |                                                                                                                                               |    |
|----------------|-----------------------------------------------------------------------------------------------------------------------------------------------|----|
| 42<br>43<br>44 | <b>Conflicts of interest</b> - Potential sources of influence or perceived influence on study conduct and conclusions; how these were managed | 30 |
| 45<br>46       | <b>Funding</b> - Sources of funding and other support; role of funders in data collection, interpretation, and reporting                      | 28 |

\*The authors created the SRQR by searching the literature to identify guidelines, reporting standards, and critical appraisal criteria for qualitative research; reviewing the reference lists of retrieved sources; and contacting experts to gain feedback. The SRQR aims to improve the transparency of all aspects of qualitative research by providing clear standards for reporting qualitative research.

1  
2  
3  
4  
5  
6  
7  
8  
9  
10  
11  
12  
13  
14  
15  
16  
17  
18  
19  
20  
21  
22  
23  
24  
25  
26  
27  
28  
29  
30  
31  
32  
33  
34  
35  
36  
37  
38  
39  
40  
41  
42  
43  
44  
45  
46  
47  
48  
49  
50  
51  
52  
53  
54  
55  
56  
57  
58  
59  
60

\*\*The rationale should briefly discuss the justification for choosing that theory, approach, method, or technique rather than other options available, the assumptions and limitations implicit in those choices, and how those choices influence study conclusions and transferability. As appropriate, the rationale for several items might be discussed together.

**Reference:**

O'Brien BC, Harris IB, Beckman TJ, Reed DA, Cook DA. **Standards for reporting qualitative research: a synthesis of recommendations.** *Academic Medicine*, Vol. 89, No. 9 / Sept 2014  
DOI: 10.1097/ACM.0000000000000388

Confidential
